# Supplementary material for: Ectopic Expression of MADS-Box Transcription Factor VvAGL12 from Grape Promotes Early Flowering, Plant Growth, and Production by Regulating Cell-Wall Architecture in Arabidopsis
Source: MDPI journal article supplement (doi:10.3390/genes14112078), 2023-11-15
Supplement: s1 [file s1]

Article

# Ectopic Expression of MADS-Box Transcription Factor *VvAGL12* from Grape Promotes Early Flowering, Plant Growth, and Production by Regulating Cell-Wall Architecture in *Arabidopsis*

Tingting Mao <sup>1,2,†</sup>, Xueting Wang <sup>1,2,†</sup>, Hongsheng Gao <sup>1,2</sup>, Zijian Gong <sup>1,2</sup>, Ruichao Liu <sup>1,2</sup>, Ning Jiang <sup>1,2</sup>, Yaru Zhang <sup>1,2</sup>, Hongxia Zhang <sup>1,2,3</sup>, Xiaotong Guo <sup>1,2</sup> and Chunyan Yu <sup>1,2,\*</sup>

## Supplementary Materials:

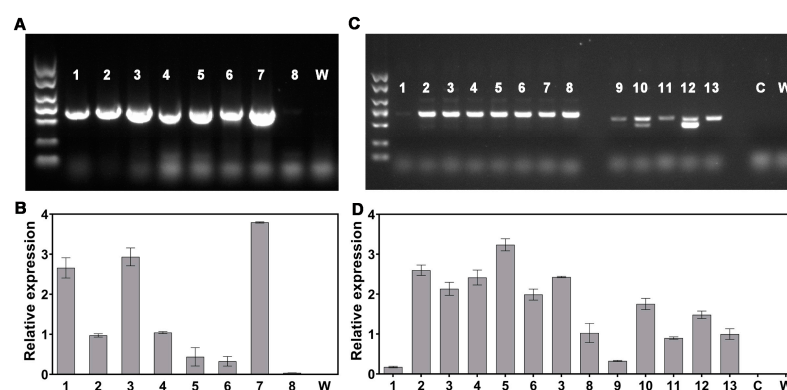

Figure S1: Molecular confirmation of *VvAGL12* transgenic *Arabidopsis*. (A) Identification of 8 overexpression of *VvAGL12* lines via PCR. (B) Evaluation of expression levels in eight *VvAGL12* overexpressing lines. (C) Identification of 13 lines with complementary mutant *agl12* by PCR. (D) Evaluation of expression levels in 13 complementary lines. The numbers represent the transgenic lines, W represents the wild-type, and C represents the water control.

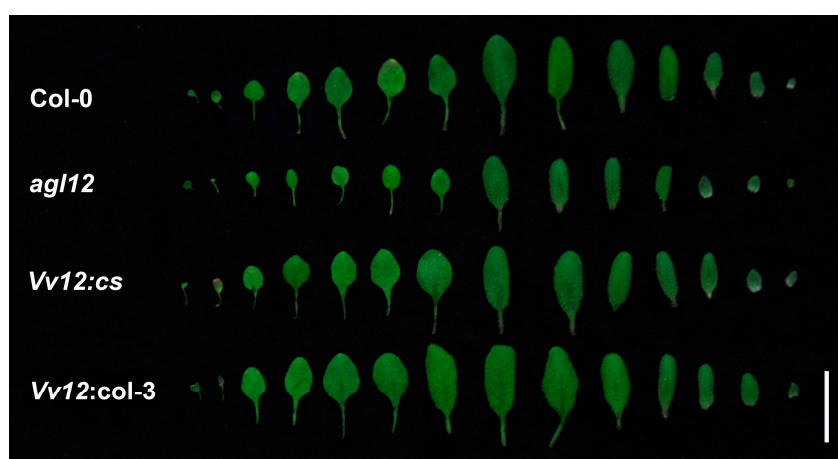

Figure S2: Phenotype of rosette leaves in four lines (Col-0, *agl12*, *Vv12:cs*, and *Vv12:col*) at reproductive growth stage. Col-0 was a wild-type *Arabidopsis*, *agl12* was a mutant of *AGL12*, *Vv12:cs* was the *VvAGL12* complementary *Arabidopsis* mutant *agl12*, and *Vv12:col* was overexpressed *VvAGL12* in the wild-type.

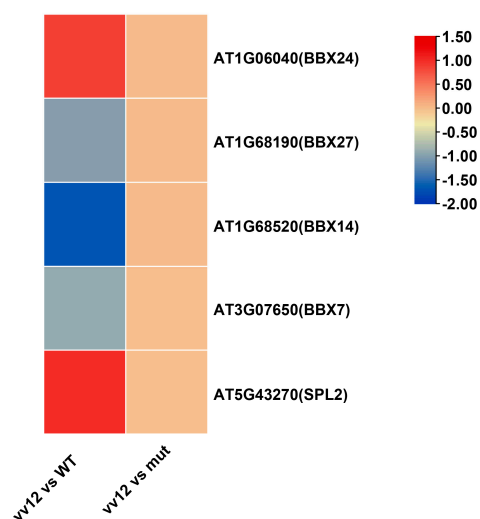

Figure S3: The Fold changes in flowering genes induced by introducing *VvAGL12* in wild-type plants.

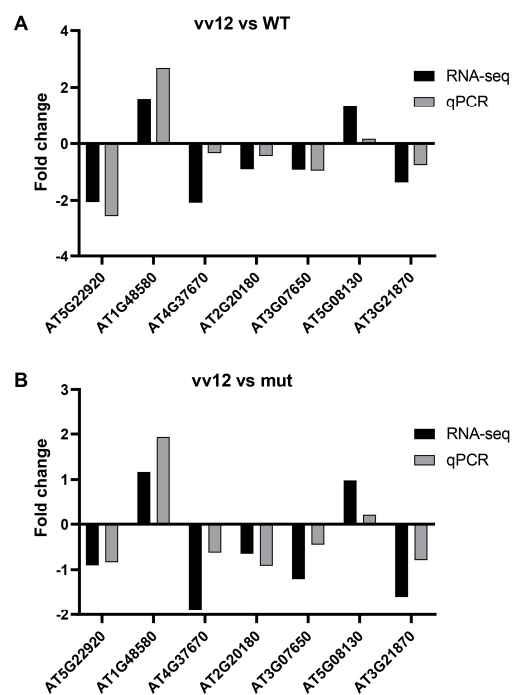

Figure S4: Validation of transcriptome data using real-time quantitative PCR. (A) Comparison between transcriptome and real-time quantitative PCR data in vv12 vs WT. (B) Comparison between transcriptome and real-time quantitative PCR data in vv12 vs Mut.
